# Supplementary material for: Metabolic networking in Brunfelsia calycina petals after flower opening
Source: PubMed Central journal article supplement — J Exp Bot. 2010 Mar 4;61(5):1393–403. doi: 10.1093/jxb/erq008 (PMC2837258; doi:10.1093/jxb/erq008), 2010-03-04
Supplement: erq008_1.pdf [file erq008_1.pdf]

## Metabolic networking in *Brunfelsia calycina* petals during flower opening

Ayelet Bar-Akiva<sup>\*1</sup>, Rinat Ovadia<sup>\*1</sup>, Ilana Rogachev<sup>\*2</sup>, Carmiya Bar-Or<sup>1</sup>, Einat Bar<sup>3</sup>, Zohar Freiman<sup>1</sup>, Ada Nissim-Levi<sup>1</sup>, Natan Gollop<sup>4</sup>, Efraim Lewinsohn<sup>3</sup>, Asaph Aharoni<sup>2</sup>, David Weiss<sup>5</sup>, Hinanit Koltai<sup>1</sup> and Michal Oren-Shamir<sup>\*\*1</sup>

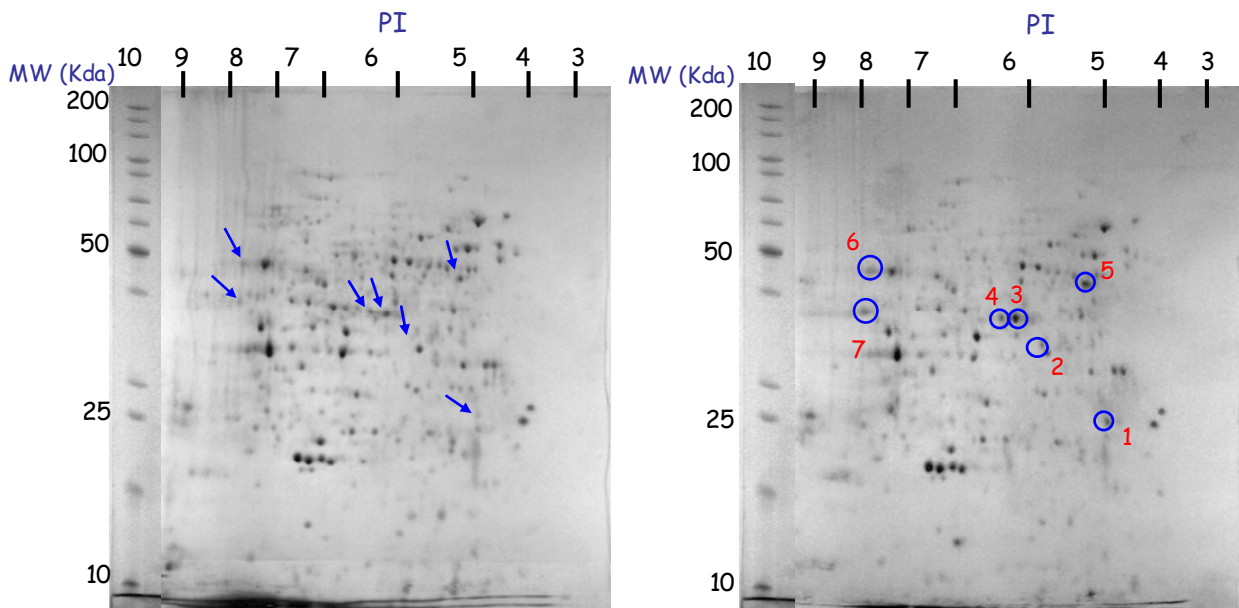

**Figure S1.** 2-D gels of total protein extracts from *Brunfelsia* flowers at D0 (left) and D2 (right) after opening. The first IEF dimension was on 13 cm dry strips (pH3-10), and the second dimension was on 12% acrylamide SDS-PAGE. Each gel is a computed average of five 2-D gels. The seven marked protein spots showed at least 3- fold increased intensity after Coomassie staining.
