# Supplementary material for: Metabolic networking in Brunfelsia calycina petals after flower opening
Source: PubMed Central journal article supplement — J Exp Bot. 2010 Mar 4;61(5):1393–403. doi: 10.1093/jxb/erq008 (PMC2837258; doi:10.1093/jxb/erq008), 2010-03-04
Supplement: erq008_2.pdf [file erq008_2.pdf]

**Table S3.** A list of up-regulated genes identified by heterologous hybridization of RNA from Brunfelsia flowers (from days 1 and 0) onto potato microarray. Genes were identified as significantly ( $P = 0.05$ ) regulated in at least one of the time points (day 0 or 1) and had a more than 2- fold increase in day 1 versus day 0. The clone name (Systematic name), the mean fold change of day 1 versus day 0 (Time 1 normalized), gene annotation (Annotation) and suggested function (Function) are presented. Suggested functional categories are presented under Systematic name, highlighted in blue. t-test (ANOVA)  $p=0.05$  and Benjamini multiple testing correction were performed for identification of significantly regulated genes. Annotations of the regulated genes were based on the potato microarray data (<http://www.tigr.org/tdb/potato/>) and on annotation of Petunia homologues (<http://www.sgn.cornell.edu/>).

| Systematic Name   | Average fold change (range) | Annotation                                                                                          | Function                                                                                                                |
|-------------------|-----------------------------|-----------------------------------------------------------------------------------------------------|-------------------------------------------------------------------------------------------------------------------------|
| <b>Metabolism</b> |                             |                                                                                                     |                                                                                                                         |
| STMEN57           | 6.232 (3.192 to 14.72)      | 68418.m06158 ferric reductase-like transmembrane component family protein similar to ferric-chelate | Iron homeostasis/Iron acquisition from soil and metabolism/Electron transport/oxidoreductase/transporter/ in the flower |
| STMGZ48           | 4.432 (2.033 to 7.647)      | (Q6XP48) UDP-Glc-4-epimerase (EC 5.1.3.2)                                                           | Galactose metabolism/ in solanum tuberosum flower                                                                       |
| STMJC15           | 4.048 (1.651 to 9.547)      | (Q82001) Tomato invertase inhibitor precursor                                                       | Sucrose metabolism-Sucrose transportation from petals to other flower parts/senescence                                  |
| STMIA83           | 3.985 (2.167 to 10.32)      | (Q6XP48) UDP-Glc-4-epimerase (EC 5.1.3.2)                                                           | Galactose metabolism                                                                                                    |
| STMCD65           | 3.79 (1.382 to 8.976)       | (Q9T0P6) Ss-galactosidase precursor (EC 3.2.1.23)                                                   | Hydrolysis of terminal non-reducing beta-D-galactose residues in beta-D-galactosides/Galactose metabolism               |
| STMIR51           | 3.65 (1.874 to 8.782)       | (Q9T0P6) Ss-galactosidase precursor (EC 3.2.1.23)                                                   | Hydrolysis of terminal non-reducing beta-D-galactose residues in beta-D-galactosides/Galactose metabolism               |
| STMJC34           | 3.383 (1.875 to 6.701)      | (Q9LRI2) Cysteine protease precursor                                                                | Cysteine-type endopeptidase activity/ proteolysis/Circadian and senescence                                              |
| STMIX65           | 2.92 (1.315 to 4.88)        | (Q8RHT6) Glycerophosphoryl diester phosphodiesterase (EC 3.1.4.46)                                  | Phosphate metabolism                                                                                                    |
| STMIC96           | 2.824 (1.71 to 4.919)       | (Q6MMW1) PiS sensor protein precursor (EC 2.7.3.-)                                                  | Nitrogen fixation regulatory protein                                                                                    |

|         |                        |                                                                                                     |                                                                                                                                                       |
|---------|------------------------|-----------------------------------------------------------------------------------------------------|-------------------------------------------------------------------------------------------------------------------------------------------------------|
| STMGQ32 | 2.815 (1.496 to 6.093) | 68415.m01944 UDP-glucuronosyl/UDP-glucosyl transferase family protein contains Pfam profile:        | Catalysis of the transfer of a glycosyl group from one compound (donor) to another (acceptor)                                                         |
| STMCV68 | 2.666 (1.014 to 6.084) | (Q6RHX8) Xyloglucan endotransglucosylase-hydrolase XTH7                                             | Hydrolase activity, hydrolyzing O-glycosyl compounds/ripening                                                                                         |
| STMIS49 | 2.628 (1.475 to 4.102) | 68416.m05666 SEC14 cytosolic factor family protein / phosphoglyceride transfer family protein       | Phosphate metabolism                                                                                                                                  |
| STMER62 | 2.614 (1.507 to 4.23)  | AT4g12290/T4C9_130 (Arabidopsis thaliana)                                                           | Diverse functions-cell wall, defense..                                                                                                                |
| STMGS26 | 2.607 (1.667 to 4.602) | (Q40158) Metallothionein-like protein type 2 B                                                      | High content of cysteine residues that bind various heavy metals/ Mainly expressed in flowers and first leaves/ Strongly up regulated by heavy metals |
| STMIV90 | 2.472 (1.573 to 4.22)  | 68417.m01946 copper amine oxidase family protein contains Pfam domain PF01179: Copper amine         | Diverse functions-cell wall, defense..                                                                                                                |
| STMIO10 | 2.456 (1.62 to 3.194)  | (Q40158) Metallothionein-like protein type 2 B                                                      | High content of cysteine residues that bind various heavy metals/ Mainly expressed in flowers and first leaves/ Strongly up regulated by heavy metals |
| STMES24 | 2.432 (1.346 to 4.239) | (Q6JJ29) Prephenate dehydratase                                                                     | L-phenylalanine biosynthetic process                                                                                                                  |
| STMIV80 | 2.364 (1.442 to 4.823) | 68418.m08223 ripening-responsive protein putative similar to ripening regulated protein DDTFR18     | Membrane protein/ transporter/ ripening                                                                                                               |
| STMHX70 | 2.325 (1.476 to 3.77)  | 68414.m09419 kelch repeat-containing F-box family protein similar to SPIQ9ER30 Kelch-related        | Motif in many proteins/ circadin clock/ protein degradation                                                                                           |
| STMER30 | 2.252 (1.21 to 4.054)  | (P10967) 1-aminocyclopropane-1-carboxylate oxidase homolog (Protein E8)                             | Acc oxidase/ Ethylene/ ripening                                                                                                                       |
| STMET80 | 2.239 (1.488 to 3.912) | 68418.m06449 sorbitol dehydrogenase putative / L-iditol 2-dehydrogenase putative similar to         | Fructose and Manose metabolism                                                                                                                        |
| STMEM11 | 2.238 (1.203 to 4.698) | (Q6PXE1) Auxin-repressed protein                                                                    |                                                                                                                                                       |
| STMIF26 | 2.216 (1.389 to 3.291) | (Q40410) Metallothionein-like protein type 2                                                        | High content of cysteine residues that bind various heavy metals/ Mainly expressed in flowers and first leaves/ Strongly up regulated by heavy metals |
| STMIT03 | 2.143 (1.085 to 3.772) | 68416.m03350 phosphoglycerate/bisphosphoglycerate mutase family protein similar to X4 protein G1:   | Carbohydrate metabolism                                                                                                                               |
| STMGS74 | 2.078 (1.005 to 3.667) | 68416.m06260 alpha-galactosidase putative / melibiase putative / alpha-D-galactoside                | Carbohydrate metabolism                                                                                                                               |
| STMIH73 | 2.073 (1.396 to 3.603) | (Q8GTJ0) Xyloglucan endotransglycosylase                                                            | Hydrolase activity, hydrolyzing O-glycosyl compounds/ripening                                                                                         |
| STMHT08 | 2.06 (1.704 to 2.772)  | 68414.m02678 2-oxoisovalerate dehydrogenase putative / 3-methyl-2-oxobutanoate dehydrogenase        | Lysin metabolism                                                                                                                                      |
| STMGV93 | 2.046 (1.457 to 3.63)  | (Q8RXA4) Putative glucosyltransferase                                                               | Carbohydrate metabolism                                                                                                                               |
| STMIJ72 | 2.03 (1.241 to 3.296)  | 68418.m05290 enoyl-CoA hydratase/isomerase family protein similar to Delta 3 5-delta2 4-dienoyl-CoA | Fatty acids and amino acids metabolism                                                                                                                |

|                                                     |                        |                                                                                                     |                                                                       |
|-----------------------------------------------------|------------------------|-----------------------------------------------------------------------------------------------------|-----------------------------------------------------------------------|
| STMEF73                                             | 2.019 (1.495 to 3.049) | 68417.m03425 glycoside hydrolase family 28 protein / polygalacturonase (pectinase) family protein   | Pectin hydrolysis in cell wall/ ripening                              |
| <b>Oxidation</b>                                    |                        |                                                                                                     |                                                                       |
| STMIZ53                                             | 4.702 (1.88 to 14.37)  | (Q42701) Cytochrome P450 (Fragment)                                                                 |                                                                       |
| STMHX09                                             | 2.917 (2.059 to 5.106) | 68417.m01588 oxidoreductase family protein similar to AX110P [Daucus carota] GI:285739; contains    |                                                                       |
| STMGR77                                             | 2.627 (1.626 to 6.471) | (Q6RJZ7) Thioredoxin                                                                                |                                                                       |
| STMHK40                                             | 2.3 (1.325 to 4.5)     | (Q8LGM8) Cytochrome P450 monooxygenase CYP72A5                                                      |                                                                       |
| STMII09                                             | 2.243 (1.181 to 4.533) | 68416.m01855 cytochrome P450 putative similar to GB:Q05047 from [Catharanthus roseus]               |                                                                       |
| STMID59                                             | 2.139 (1.166 to 3.782) | 68416.m01858 cytochrome P450 putative similar to GB:Q05047 from [Catharanthus roseus]               |                                                                       |
| STMCU85                                             | 2.128 (1.229 to 3.382) | 68416.m01850 cytochrome P450 putative similar to GB:Q05047 from [Catharanthus roseus]               |                                                                       |
| STMHS70                                             | 2.108 (1.273 to 2.986) | (Q39684) AX110P                                                                                     |                                                                       |
| STMIX70                                             | 2.058 (1.001 to 3.533) | 68417.m03685 cytochrome B561 family protein contains Pfam domain PF03188: Cytochrome b561           |                                                                       |
| STMEQ24                                             | 2.057 (1.183 to 3.687) | Cytochrome b561                                                                                     |                                                                       |
| <b>Transcription/RNA processing</b>                 |                        |                                                                                                     |                                                                       |
| STMCU81                                             | 4.007 (2.24 to 9.227)  | (Q941L7) BZIP transcription factor BZI-2                                                            | Flower development                                                    |
| STMIU33                                             | 2.321 (1.654 to 4.847) | (Q8SLI2) Maturase K (Fragment)                                                                      | Cellular componenet of the chloroplast/ rna splicing/ mrna processing |
| STMIU43                                             | 2.226 (1.372 to 3.239) | 68418.m05713 16S rRNA processing protein RimM family contains weak similarity to Swiss-Prot:O74933  |                                                                       |
| STMJK91                                             | 2.084 (1.641 to 2.798) | Myb-like protein {Oryza sativa (japonica cultivar-group);}                                          |                                                                       |
| STMDC51                                             | 2.063 (1.584 to 2.79)  | (Q9SP54) LIM domain protein WLIM1                                                                   | Transcription factor/ zinc/ cytoskeleton                              |
| <b>Translation/Post translation</b>                 |                        |                                                                                                     |                                                                       |
| STMJN87                                             | 3.463 (1.879 to 8.815) | (O04679) Farnesyl-protein transferase beta subunit (EC 2.5.1.-)                                     | Post translation modification                                         |
| STMEH80                                             | 3.014 (1.932 to 4.032) | (P56337) Eukaryotic translation initiation factor 5A-5 (eIF-5A 5) (eIF-4D)                          |                                                                       |
| <b>Protein destination ,storage and degradation</b> |                        |                                                                                                     |                                                                       |
| STMHX44                                             | 3.518 (1.618 to 9.012) | 68416.m06250 copper homeostasis factor / copper chaperone (CCH) (ATX1) identical to gi:3168840 Pfam |                                                                       |
| STMHW51                                             | 3.339 (1.702 to 8.595) | (Q84KJ2) Copper chaperone                                                                           |                                                                       |
| STMCG40                                             | 2.898 (1.189 to 5.721) | 68418.m06883 trigger factor type chaperone family protein contains Pfam profiles PF05697: Bacterial |                                                                       |

|                     |                        |                                                                                                    |                                            |
|---------------------|------------------------|----------------------------------------------------------------------------------------------------|--------------------------------------------|
| STMCX50             | 2.703 (1.381 to 6.049) | (Q6J338) Copper chaperone                                                                          |                                            |
| STMCJ27             | 2.224 (1.174 to 3.415) | 68418.m06172 ATP-dependent Clp protease ATP-binding subunit ClpX putative similar to CLP protease  | Protein degradation in plastids            |
| STMIF70             | 2.125 (1.056 to 3.907) | (Q6V8R2) Putative DnaJ protein (Fragment)                                                          | Chaperon/ taking proteins to peroxisome    |
| <b>Transporters</b> |                        |                                                                                                    |                                            |
| STMGJ46             | 4.21 (2.238 to 10.73)  | sulfate transporter (Arabidopsis thaliana;)                                                        |                                            |
| STMIH60             | 2.469 (1.498 to 4.067) | (Q8PI19) Cationic amino acid transporter                                                           |                                            |
| STMGU60             | 2.185 (1.108 to 4.238) | 68415.m03201 nitrate transporter (NTP2) identical to nitrate transporter (ntp2)                    | Wounding/ Jasmonic acid                    |
| <b>Defense</b>      |                        |                                                                                                    |                                            |
| STMHY32             | 4.771 (1.645 to 11.06) | (Q7XJE7) Putative xyloglucanase inhibitor                                                          |                                            |
| STMHX25             | 3.421 (2.58 to 4.652)  | 68414.m09182 pathogenesis-related family protein contains similarity to pathogen-related protein   |                                            |
| STMEW74             | 3.325 (2.215 to 5.084) | (Q9ZRB6) Ci21A protein                                                                             | Cold regulated gene in potato              |
| STMDB42             | 2.949 (1.951 to 4.774) | (Q8L9B0) Pathogenesis-related protein-like protein                                                 |                                            |
| STMHZ25             | 2.943 (1.971 to 4.484) | (Q9ZRB5) Ci21B protein                                                                             | Cold regulated gene in potato              |
| STMIO81             | 2.923 (1.581 to 5.573) | Trypsin putative                                                                                   |                                            |
| STMID92             | 2.706 (1.622 to 5.288) | 68416.m06514 universal stress protein (USP) family protein contains Pfam PF00582: universal stress |                                            |
| STMEW11             | 2.59 (1.837 to 3.731)  | (Q8H0L9) DS2 protein                                                                               | Stress induced protein                     |
| STMIW38             | 2.281 (1.251 to 5.192) | (Q9LW93) Nicotiana tabacum wound inducive mRNA complete cds                                        |                                            |
| STMIS93             | 2.239 (1.622 to 3.669) | (P05315) Endochitinase precursor (EC 3.2.1.14 EC 3.2.1.14 EC 3.2.1.14)                             | Defence again fungal pathogens with chitin |
| STMCA80             | 2.211 (1.221 to 3.569) | (Q9LW93) Nicotiana tabacum wound inducive mRNA complete cds                                        |                                            |
| STMJA36             | 2.206 (1.583 to 3.672) | 68418.m07876 band 7 family protein strong similarity to hypersensitive-induced response protein    |                                            |
| STMJI19             | 2.151 (1.294 to 3.283) | 68414.m09182 pathogenesis-related family protein contains similarity to pathogen-related protein   |                                            |
| STMIX53             | 2.116 (1.219 to 3.508) | 68418.m07876 band 7 family protein strong similarity to hypersensitive-induced response protein    |                                            |
| STMIN77             | 2.109 (1.423 to 3.525) | (O81144) Class I chitinase (EC 3.2.1.14 EC 3.2.1.14)                                               |                                            |
| STMCK62             | 2.053 (1.043 to 4.449) | 68416.m01522 serine carboxypeptidase S10 family protein contains Pfam profile: PF00450 serine      | Wounding and protein degradation           |
| STMIU20             | 2.031 (1.279 to 2.728) | 68417.m00172 CAAX protease putative (STE24) contains Pfam domain PF01435: Peptidase family M48     | Heat shock protein                         |

|                             |                        |                                                                                                      |                                                                                                |
|-----------------------------|------------------------|------------------------------------------------------------------------------------------------------|------------------------------------------------------------------------------------------------|
| <b>Cell structure</b>       |                        |                                                                                                      |                                                                                                |
| STMIF12                     | 3.027 (1.437 to 4.603) | 68418.m01103 hydroxyproline-rich glycoprotein family protein contains proline-rich extensin domains  |                                                                                                |
| STMJK93                     | 2.541 (1.427 to 3.52)  | (Q9W596) Microtubule-associated protein futsch                                                       |                                                                                                |
| STMIH61                     | 2.291 (1.163 to 3.626) | 68418.m01103 hydroxyproline-rich glycoprotein family protein contains proline-rich extensin domains  |                                                                                                |
| STMJJ12                     | 2.229 (1.351 to 4.128) | 68418.m01103 hydroxyproline-rich glycoprotein family protein contains proline-rich extensin domains  |                                                                                                |
| STMIX33                     | 2.092 (1.476 to 3.084) | (Q40142) Cell wall protein precursor                                                                 |                                                                                                |
| STMIG95                     | 2.034 (1.183 to 3.567) | 68418.m01101 hydroxyproline-rich glycoprotein family protein contains proline-rich extensin domains  |                                                                                                |
| <b>Signal transduction</b>  |                        |                                                                                                      |                                                                                                |
| STMFA19                     | 2.355 (1.432 to 3.759) | (Q41342) Ethylene receptor 1 (LeETR1) (EC 2.7.3.- EC 2.7.3.-)                                        |                                                                                                |
| <b>Secondary metabolism</b> |                        |                                                                                                      |                                                                                                |
| STMHW02                     | 5.39 (3.246 to 10.18)  | (P15004) Suberization-associated anionic peroxidase 2 precursor (TMP2)                               | Suberization                                                                                   |
| STMCL66                     | 5.271 (4.096 to 7.023) | (Q9M527) Phenylcoumaran benzylic ether reductase homolog Fi2                                         | Lignification                                                                                  |
| STMDQ29                     | 4.608 (3.016 to 9.118) | (Q41242) Alcohol dehydrogenase ADH                                                                   |                                                                                                |
| STMCC79                     | 3.475 (2.195 to 4.905) | (Q42958) Catechol O-methyltransferase (EC 2.1.1.6 EC 2.1.1.6)                                        | Lignification                                                                                  |
| STMJL95                     | 3.387 (1.797 to 5.991) | (Q8H9B6) Caffeoyl-CoA O-methyltransferase (Trans-caffeoyl-CoA 3-O-methyltransferase) (CCoAMT)        | Lignification                                                                                  |
| STMIC60                     | 3.361 (2.379 to 4.822) | (Q42945) Caffeoyl-CoA O-methyltransferase 6 (Trans-caffeoyl-CoA 3-O-methyltransferase 6) (CCoAMT-6)  | Lignification                                                                                  |
| STMCL31                     | 3.037 (0.936 to 5.418) | (Q9AVG9) S-adenosyl-L-methionine:salicylic acid carboxyl methyltransferase                           | Scent/ enzymatic activity that catalyzes the formation of methylsalicylate from salicylic acid |
| STMER77                     | 3.023 (1.58 to 7.432)  | (P15004) Suberization-associated anionic peroxidase 2 precursor (TMP2)                               | Suberization                                                                                   |
| STMCK29                     | 2.867 (2.037 to 4.372) | (Q9XH50) 1-D-deoxyxylulose 5-phosphate synthase                                                      | Terpenoids/ IPP synthesis                                                                      |
| STMCY65                     | 2.745 (1.409 to 5.622) | (Q82676) 1-deoxyxylulose 5-phosphate synthase                                                        | Terpenoids/ IPP synthesis                                                                      |
| STMHZ50                     | 2.586 (1.723 to 3.886) | (Q8H9B6) Caffeoyl-CoA O-methyltransferase (Trans-caffeoyl-CoA 3-O-methyltransferase) (CCoAMT)        | Lignification                                                                                  |
| STMEM71                     | 2.4 (0.927 to 5.05)    | (Q9MB73) Limonoid UDP-glucosyltransferase (Limonoid glucosyltransferase) (Limonoid GTase) (LGTase)   | Terpenoids/ glucosylation of limonoids                                                         |
| STMIN59                     | 2.38 (1.399 to 4.517)  | (Q8GVE3) Flavonoid 1-2 rhamnosyltransferase                                                          | Biosynthesis of flavonoids                                                                     |
| STM EU71                    | 2.365 (1.076 to 3.65)  | 68418.m05207 O-methyltransferase N-terminus domain-containing protein contains Pfam profile PF02409: | Lignification                                                                                  |

|                       |                        |                                                                                                 |                                                        |
|-----------------------|------------------------|-------------------------------------------------------------------------------------------------|--------------------------------------------------------|
| STMIX91               | 2.322 (0.126 to 4.496) | (P30359) Cinnamyl-alcohol dehydrogenase (CAD) (EC 1.1.1.195 EC 1.1.1.195 EC 1.1.1.195)          | Lignification                                          |
| STMIJ60               | 2.267 (1.662 to 3.439) | (Q9SXJ0) Transcription factor Ntlm1                                                             | Lignification/ zinc binding                            |
| STMHR20               | 2.151 (1.657 to 3.4)   | adenosine monophosphate binding protein 7 AMPBP7                                                | Acyl co-A synthase/ secondary metabolites biosynthesis |
| STMGM34               | 2.113 (1.5 to 3.42)    | (Q42698) Geranylgeranyl pyrophosphate synthetase chloroplast precursor (GGPP synthetase) (GGPS) | Carotenoids                                            |
| STMEP23               | 2.056 (1.16 to 3.063)  | (Q41437) 3-hydroxy-3-methylglutaryl-coenzyme A reductase 2 (HMG-CoA reductase 2) (HMG2.2)       | Isoprenoids synthesis/ mevalonate synthesis            |
| STMCB66               | 2.054 (1.652 to 2.731) | 68417.m04881 LytB family protein contains Pfam profile: PF02401 LytB protein                    | Isoprenoids synthesis/ Enzyme                          |
| STMIV38               | 2.037 (0.684 to 5.894) | (P28554) Phytoene dehydrogenase chloroplast precursor (Phytoene desaturase)                     | Carotenoids                                            |
| <b>Photosynthesis</b> |                        |                                                                                                 |                                                        |
| STMHZ22               | 5.104 (2.163 to 10.49) | unnamed protein product; ST-LS1 protein (AA 1-138) {Solanum tuberosum;}                         |                                                        |
| STMFB17               | 3.586 (1.607 to 6.626) | (P26575) Ribulose bisphosphate carboxylase small chain 2A chloroplast precursor                 |                                                        |
| STMIZ57               | 3.497 (1.774 to 5.197) | (P06183) Photosystem II 10 kDa polypeptide chloroplast precursor                                |                                                        |
| STMET36               | 3.441 (1.777 to 5.238) | (P26575) Ribulose bisphosphate carboxylase small chain 2A chloroplast precursor                 |                                                        |
| STMCE25               | 3.406 (2.027 to 5.015) | (P26575) Ribulose bisphosphate carboxylase small chain 2A chloroplast precursor                 |                                                        |
| STMCG74               | 3.247 (0.5 to 7.765)   | (P26575) Ribulose bisphosphate carboxylase small chain 2A chloroplast precursor                 |                                                        |
| STM CJ24              | 3.117 (1.542 to 5.367) | (P26574) Ribulose bisphosphate carboxylase small chain 1 chloroplast precursor                  |                                                        |
| STM IW88              | 3.038 (1.396 to 5.35)  | (P26575) Ribulose bisphosphate carboxylase small chain 2A chloroplast precursor                 |                                                        |
| STM CG51              | 3.002 (0.912 to 5.399) | (P26575) Ribulose bisphosphate carboxylase small chain 2A chloroplast precursor                 |                                                        |
| STM ET72              | 2.996 (1.137 to 6.317) | (P26574) Ribulose bisphosphate carboxylase small chain 1 chloroplast precursor                  |                                                        |
| STM CG28              | 2.949 (1.426 to 5.192) | (P26574) Ribulose bisphosphate carboxylase small chain 1 chloroplast precursor                  |                                                        |
| STM IR27              | 2.906 (1.551 to 4.716) | (P26575) Ribulose bisphosphate carboxylase small chain 2A chloroplast precursor                 |                                                        |

|                           |                        |                                                                                                      |  |
|---------------------------|------------------------|------------------------------------------------------------------------------------------------------|--|
| STMIW68                   | 2.898 (1.526 to 5.097) | (P26575) Ribulose biphosphate carboxylase small chain 2A chloroplast precursor                       |  |
| STMCP20                   | 2.896 (1.455 to 5.121) | (P26577) Ribulose biphosphate carboxylase small chain 2C chloroplast precursor                       |  |
| STMCM49                   | 2.888 (1.519 to 4.384) | (P06183) Photosystem II 10 kDa polypeptide chloroplast precursor                                     |  |
| STMCB56                   | 2.831 (1.309 to 4.521) | (P26574) Ribulose biphosphate carboxylase small chain 1 chloroplast precursor                        |  |
| STMCG27                   | 2.791 (1.389 to 4.346) | (P26575) Ribulose biphosphate carboxylase small chain 2A chloroplast precursor                       |  |
| STMIX84                   | 2.772 (1.385 to 5.094) | (P26574) Ribulose biphosphate carboxylase small chain 1 chloroplast precursor                        |  |
| STMIP23                   | 2.639 (1.34 to 4.173)  | 68417.m04615 peptidyl-prolyl cis-trans isomerase cyclophilin-type family protein weak similarity to  |  |
| STMCCQ63                  | 2.639 (1.189 to 5.125) | (P26574) Ribulose biphosphate carboxylase small chain 1 chloroplast precursor                        |  |
| STMIY49                   | 2.467 (1.445 to 4.534) | (P26574) Ribulose biphosphate carboxylase small chain 1 chloroplast precursor                        |  |
| STMDB96                   | 2.42 (1.341 to 3.84)   | (Q41387) Photosystem II reaction center W protein chloroplast precursor (PSII 6.1 kDa protein)       |  |
| STMEQ02                   | 2.351 (1.143 to 4.172) | 68416.m06426 peptidase S41 family protein similar to PSII D1 protein processing enzyme (GI::7268527) |  |
| STMCB57                   | 2.291 (1.159 to 3.689) | (Q84UU0) Photosystem I subunit XI                                                                    |  |
| STMCCQ90                  | 2.237 (1.56 to 3.248)  | chlorophyll a/b-binding protein type I precursor (cab-6A) - tomato {Lycopersicon esculentum;}        |  |
| STMCCX03                  | 2.235 (1.328 to 3.982) | (P26575) Ribulose biphosphate carboxylase small chain 2A chloroplast precursor                       |  |
| STMIW93                   | 2.189 (1.01 to 4.088)  | (P26574) Ribulose biphosphate carboxylase small chain 1 chloroplast precursor                        |  |
| STMCCZ35                  | 2.156 (1.36 to 4.481)  | (Q41228) Photosystem I reaction center subunit IV A chloroplast precursor (PSI-E A)                  |  |
| STMEW75                   | 2.133 (1.284 to 2.729) | (Q41387) Photosystem II reaction center W protein chloroplast precursor (PSII 6.1 kDa protein)       |  |
| STMCL53                   | 2.096 (1.291 to 3.105) | (P06183) Photosystem II 10 kDa polypeptide chloroplast precursor                                     |  |
| <b>Others and unknown</b> |                        |                                                                                                      |  |
| STMIJ42                   | 3.834 (1.815 to 7.448) | 68418.m01845 pollen Ole e 1 allergen and extensin family protein contains Pfam profile PF01190:      |  |

|         |                        |                                                                                                 |  |
|---------|------------------------|-------------------------------------------------------------------------------------------------|--|
| STMHT55 | 3.495 (2.227 to 7.384) | Nicotiana tabacum 18S rRNA gene                                                                 |  |
| STMDB78 | 3.358 (1.914 to 6.599) | (Q94I88) Putative miraculin (Fragment)                                                          |  |
| STMIZ92 | 3.032 (1.38 to 4.949)  | (Q6L4A7) Expressed protein                                                                      |  |
| STMDB95 | 2.981 (1.179 to 5.769) | 68414.m04006 expressed protein                                                                  |  |
| STMCC47 | 2.758 (1.647 to 4.54)  | (Q94I88) Putative miraculin (Fragment)                                                          |  |
| STMIY29 | 2.671 (1.22 to 5.011)  | (Q6H4I2) Brain protein 44-like                                                                  |  |
| STMIQ48 | 2.486 (1.38 to 4.057)  | 68414.m00754 gamma interferon responsive lysosomal thiol reductase family protein / GILT family |  |
| STMEP42 | 2.315 (1.38 to 3.396)  | (Q8H0H5) Hypothetical protein A20                                                               |  |
| STMEU74 | 2.266 (1.337 to 4.054) | (Q942Q2) P0701D05.1 protein (B1189A09.32 protein)                                               |  |
| STMIJ14 | 2.161 (1.692 to 2.916) | (Q9M614) Hypothetical protein                                                                   |  |
| STMEQ20 | 2.136 (1.299 to 4.047) | 68415.m01821 expressed protein                                                                  |  |
| STMJA56 | 2.103 (1.419 to 3.086) | 68418.m01597 expressed protein                                                                  |  |
| STMEJ62 | 2.083 (1.173 to 4.549) | (Q9CBP6) Hypothetical protein ML1750                                                            |  |
| STMEZ48 | 2.069 (1.22 to 3.521)  | unknown {Populus tremuloides;}                                                                  |  |
